# Supplementary figures and images for: Inhibition of Dipeptidyl Peptidase IV With Sitagliptin (MK0431) Prolongs Islet Graft Survival in Streptozotocin-Induced Diabetic Mice
Source: Oxford University Press journal article supplement (doi:10.2337/db07-1639), 2008-02-26

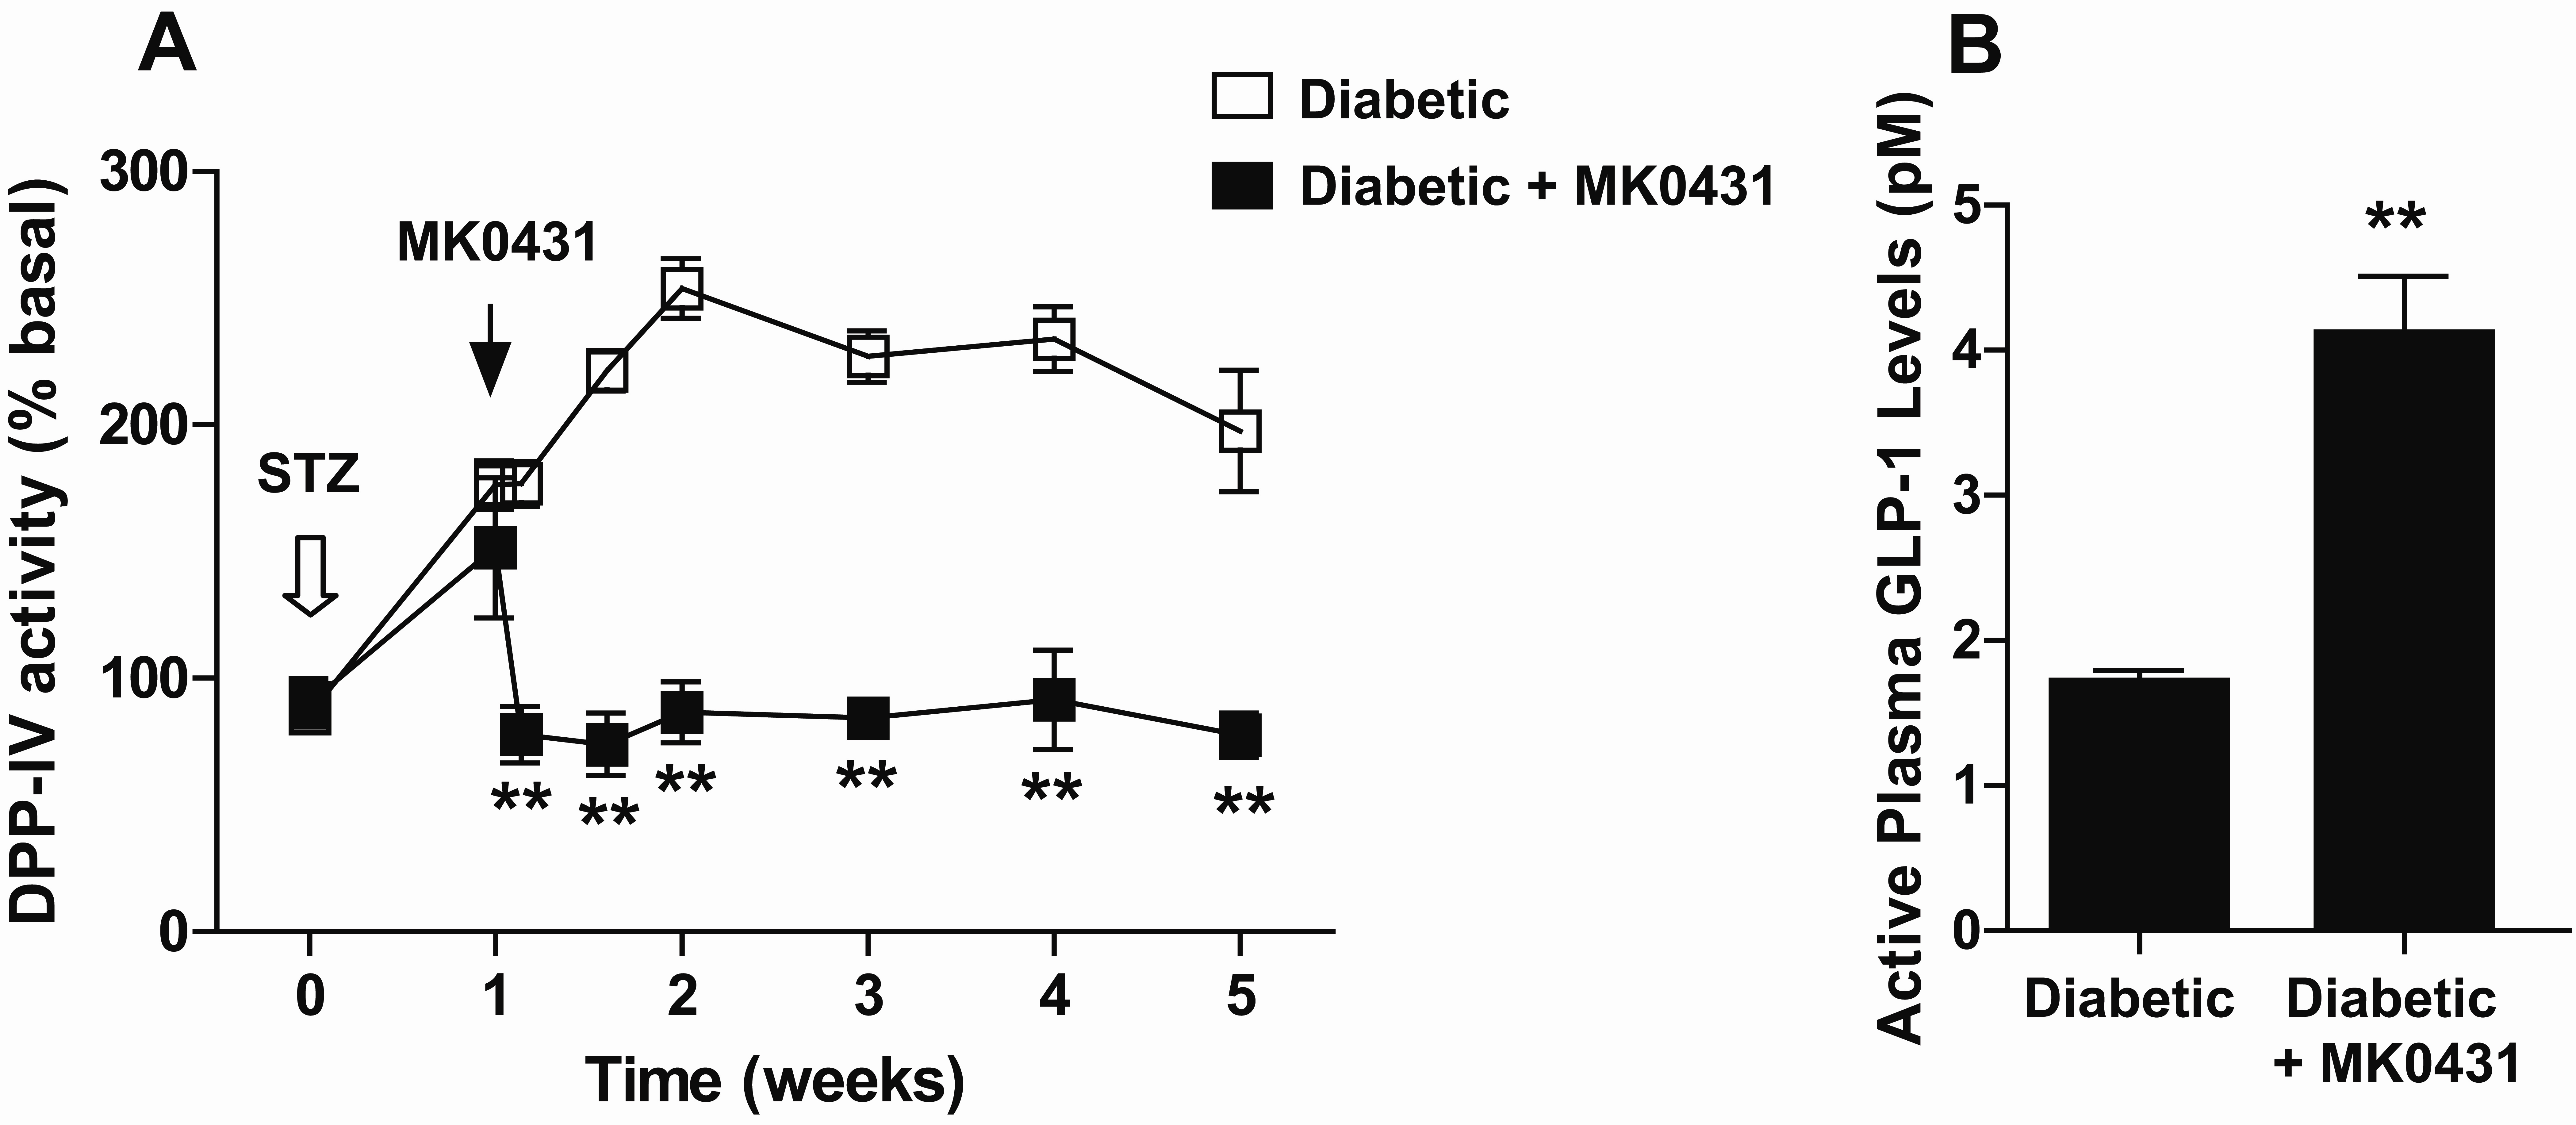


**FIGURE 1**

**
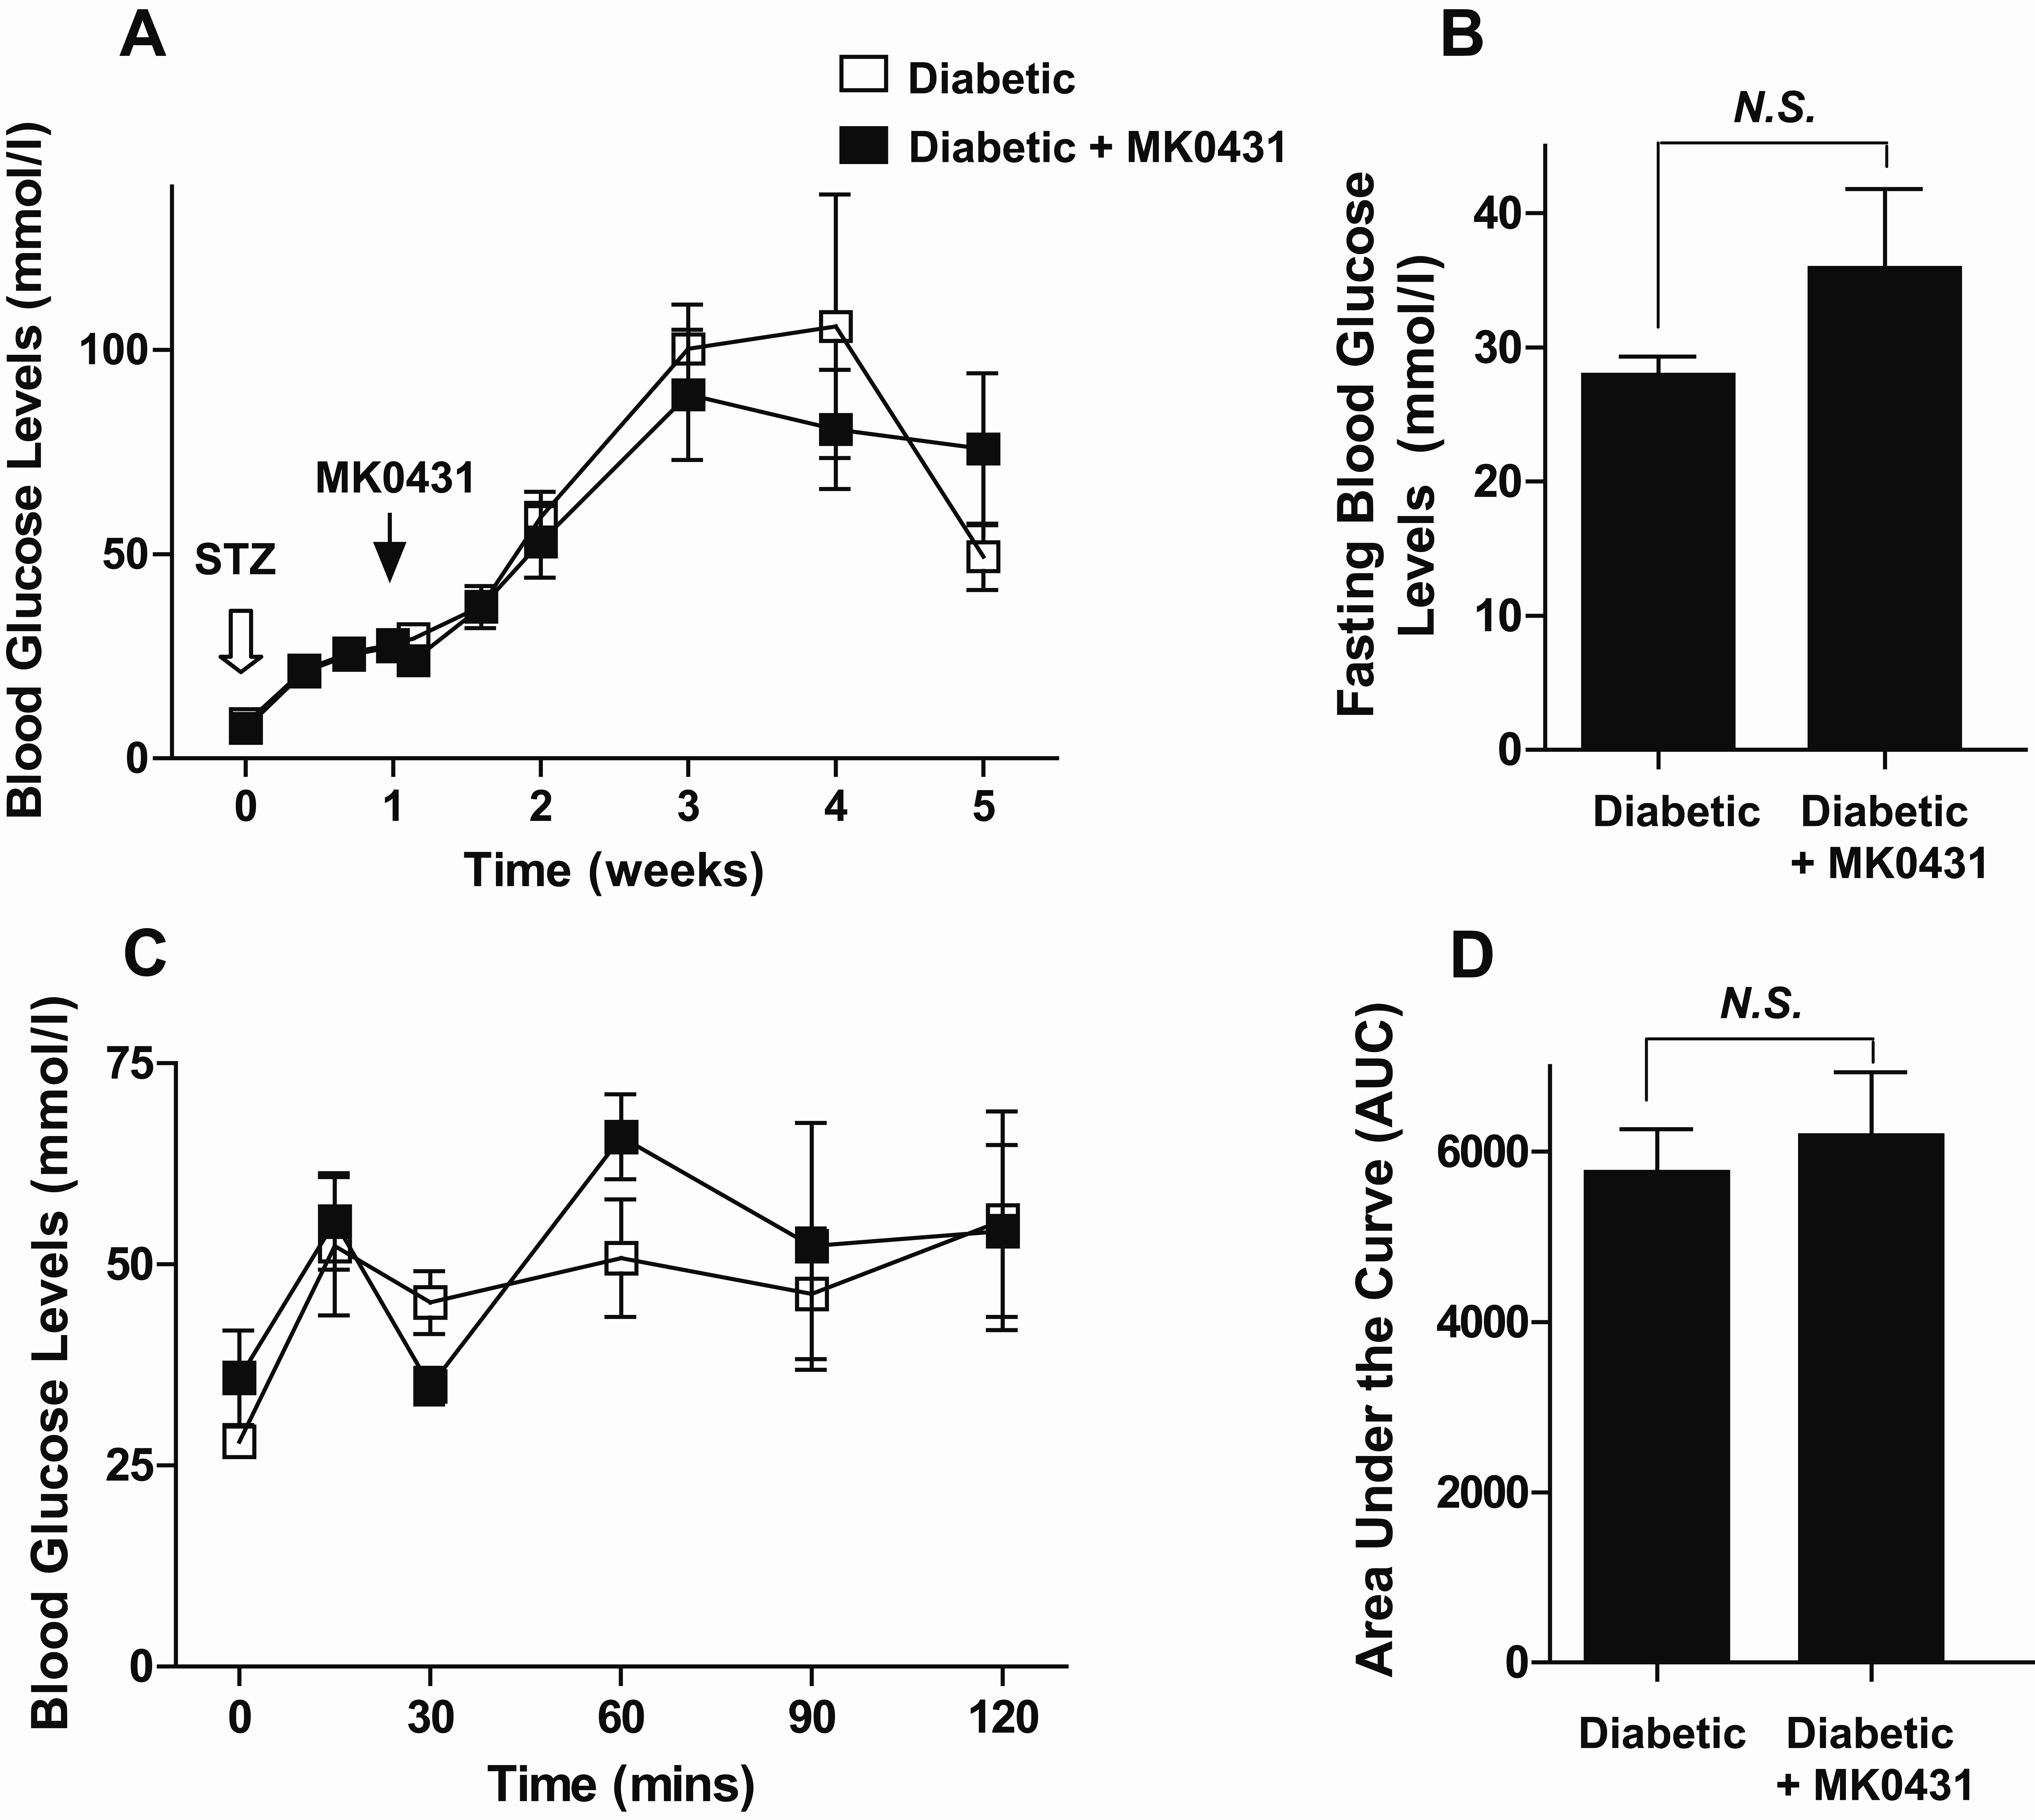
**

**FIGURE 2(A-D)**

**
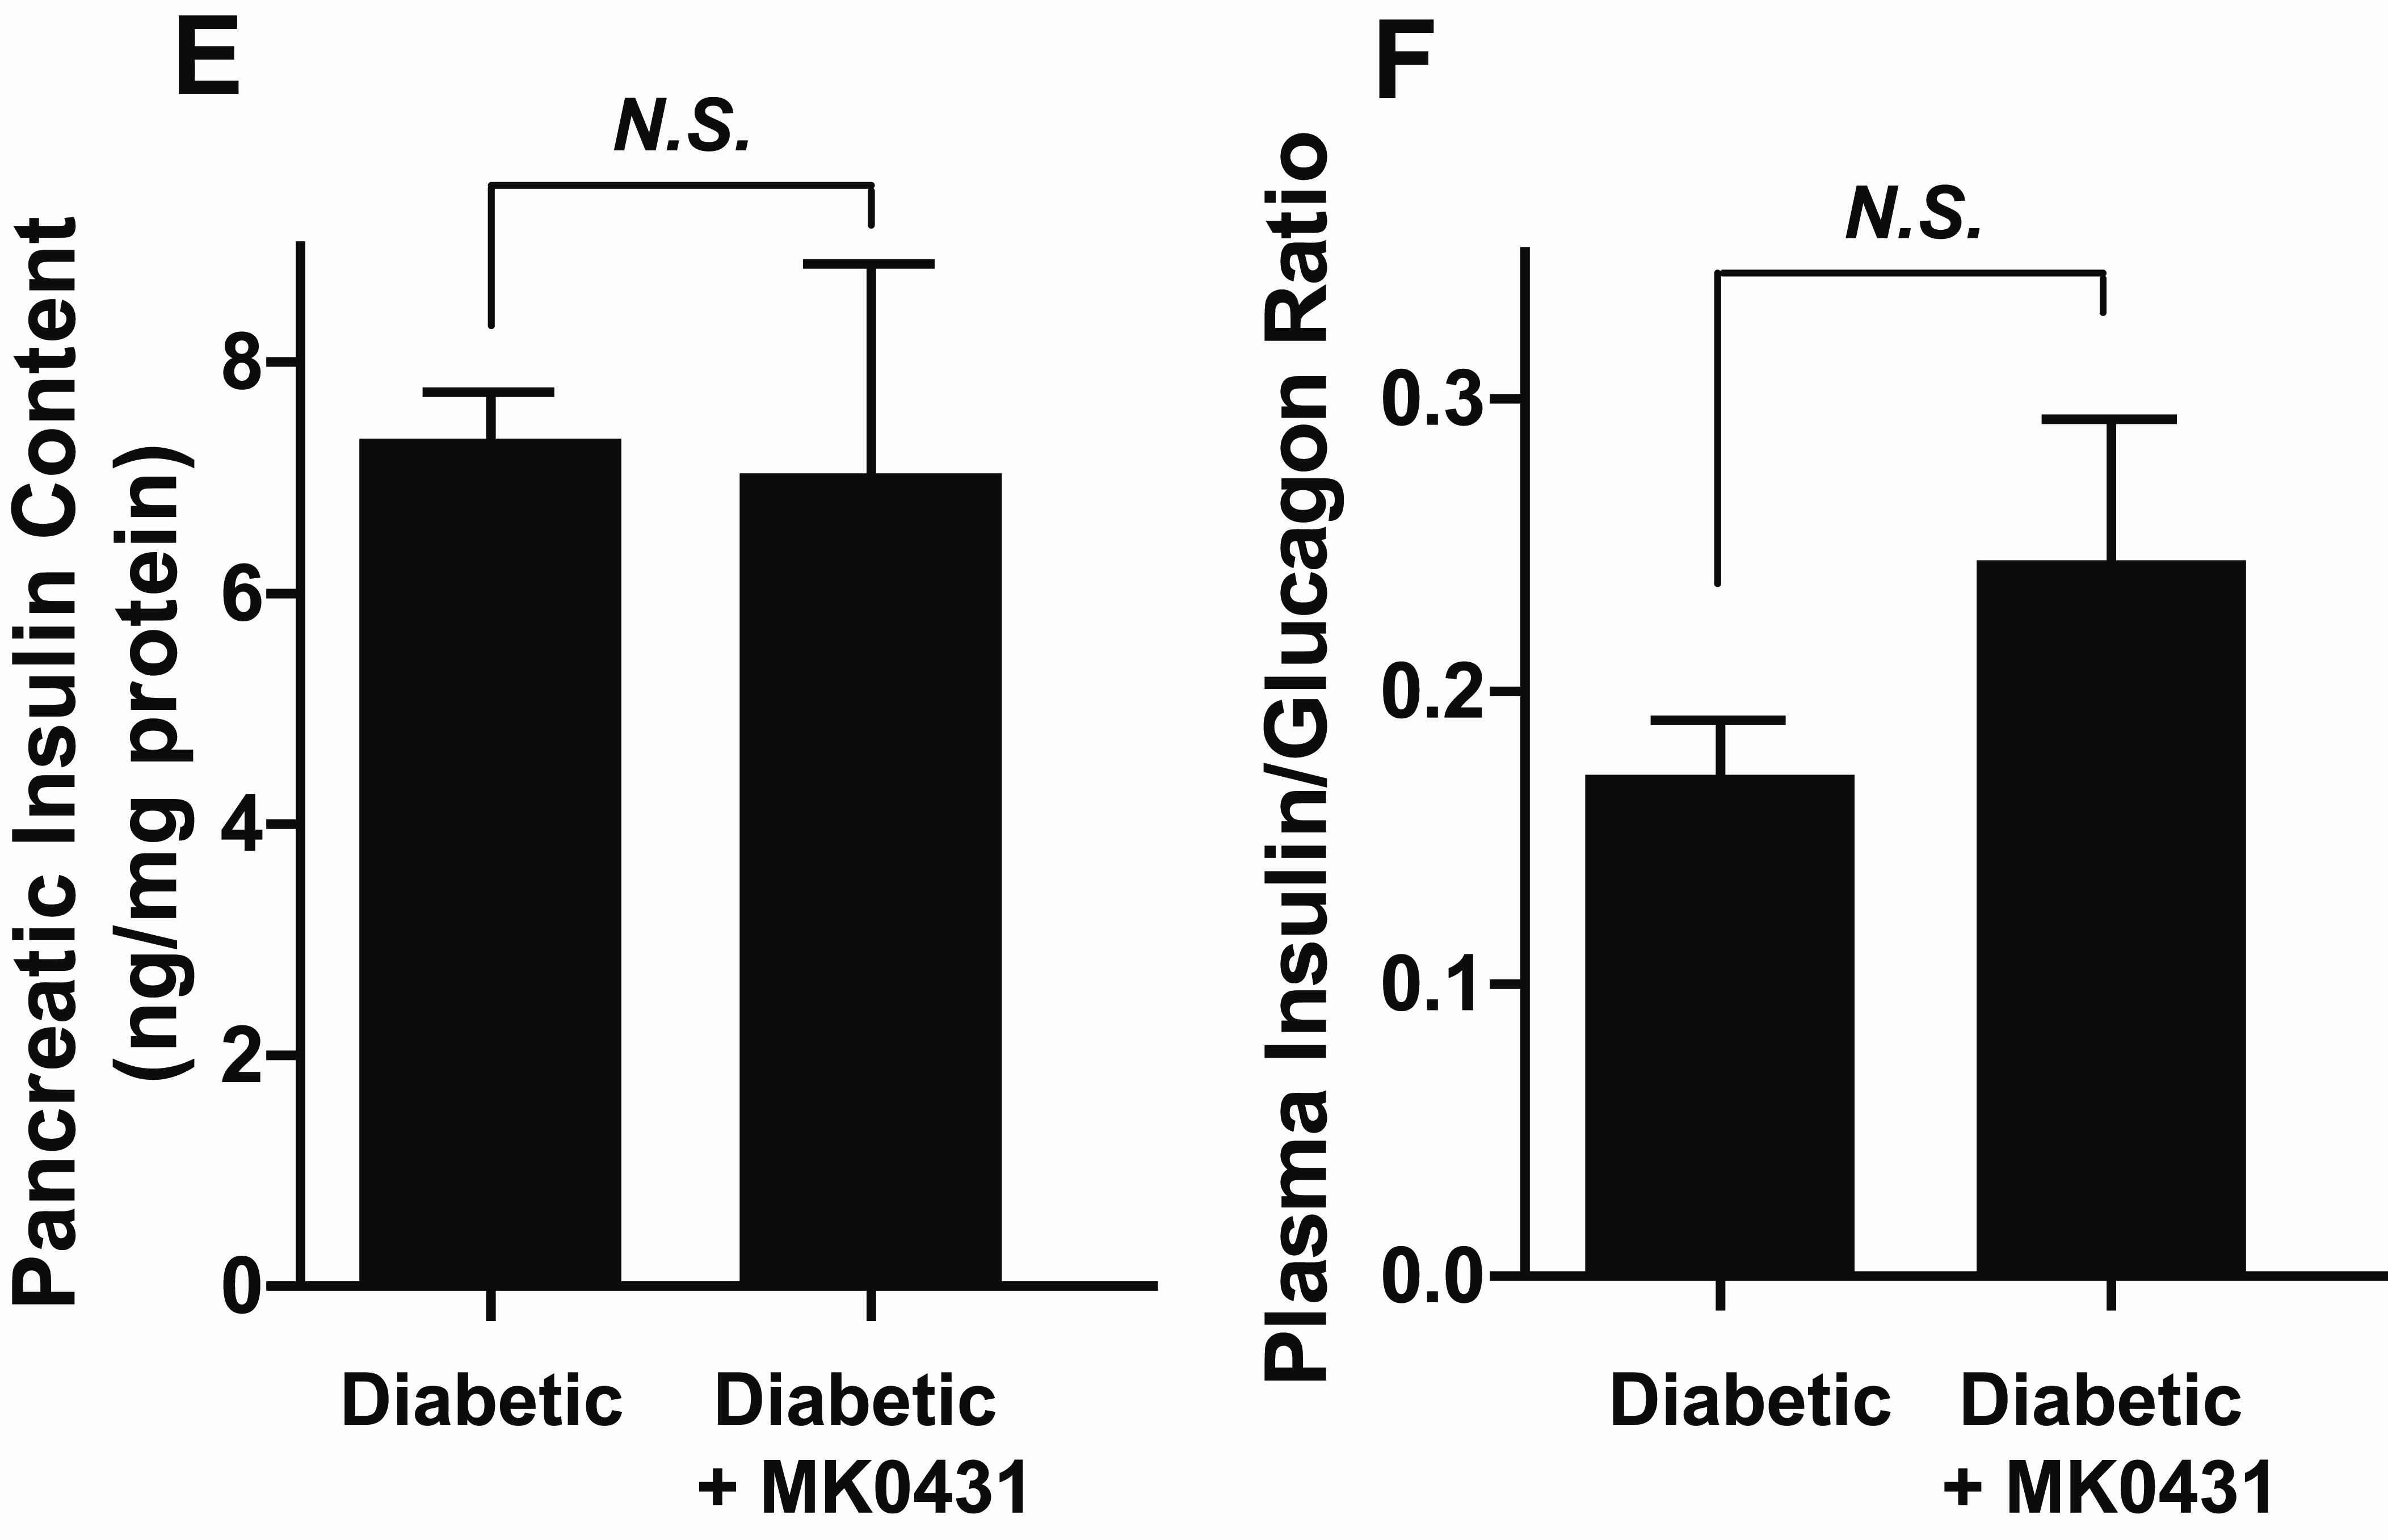
**

**FIGURE 2(E-F)**

**
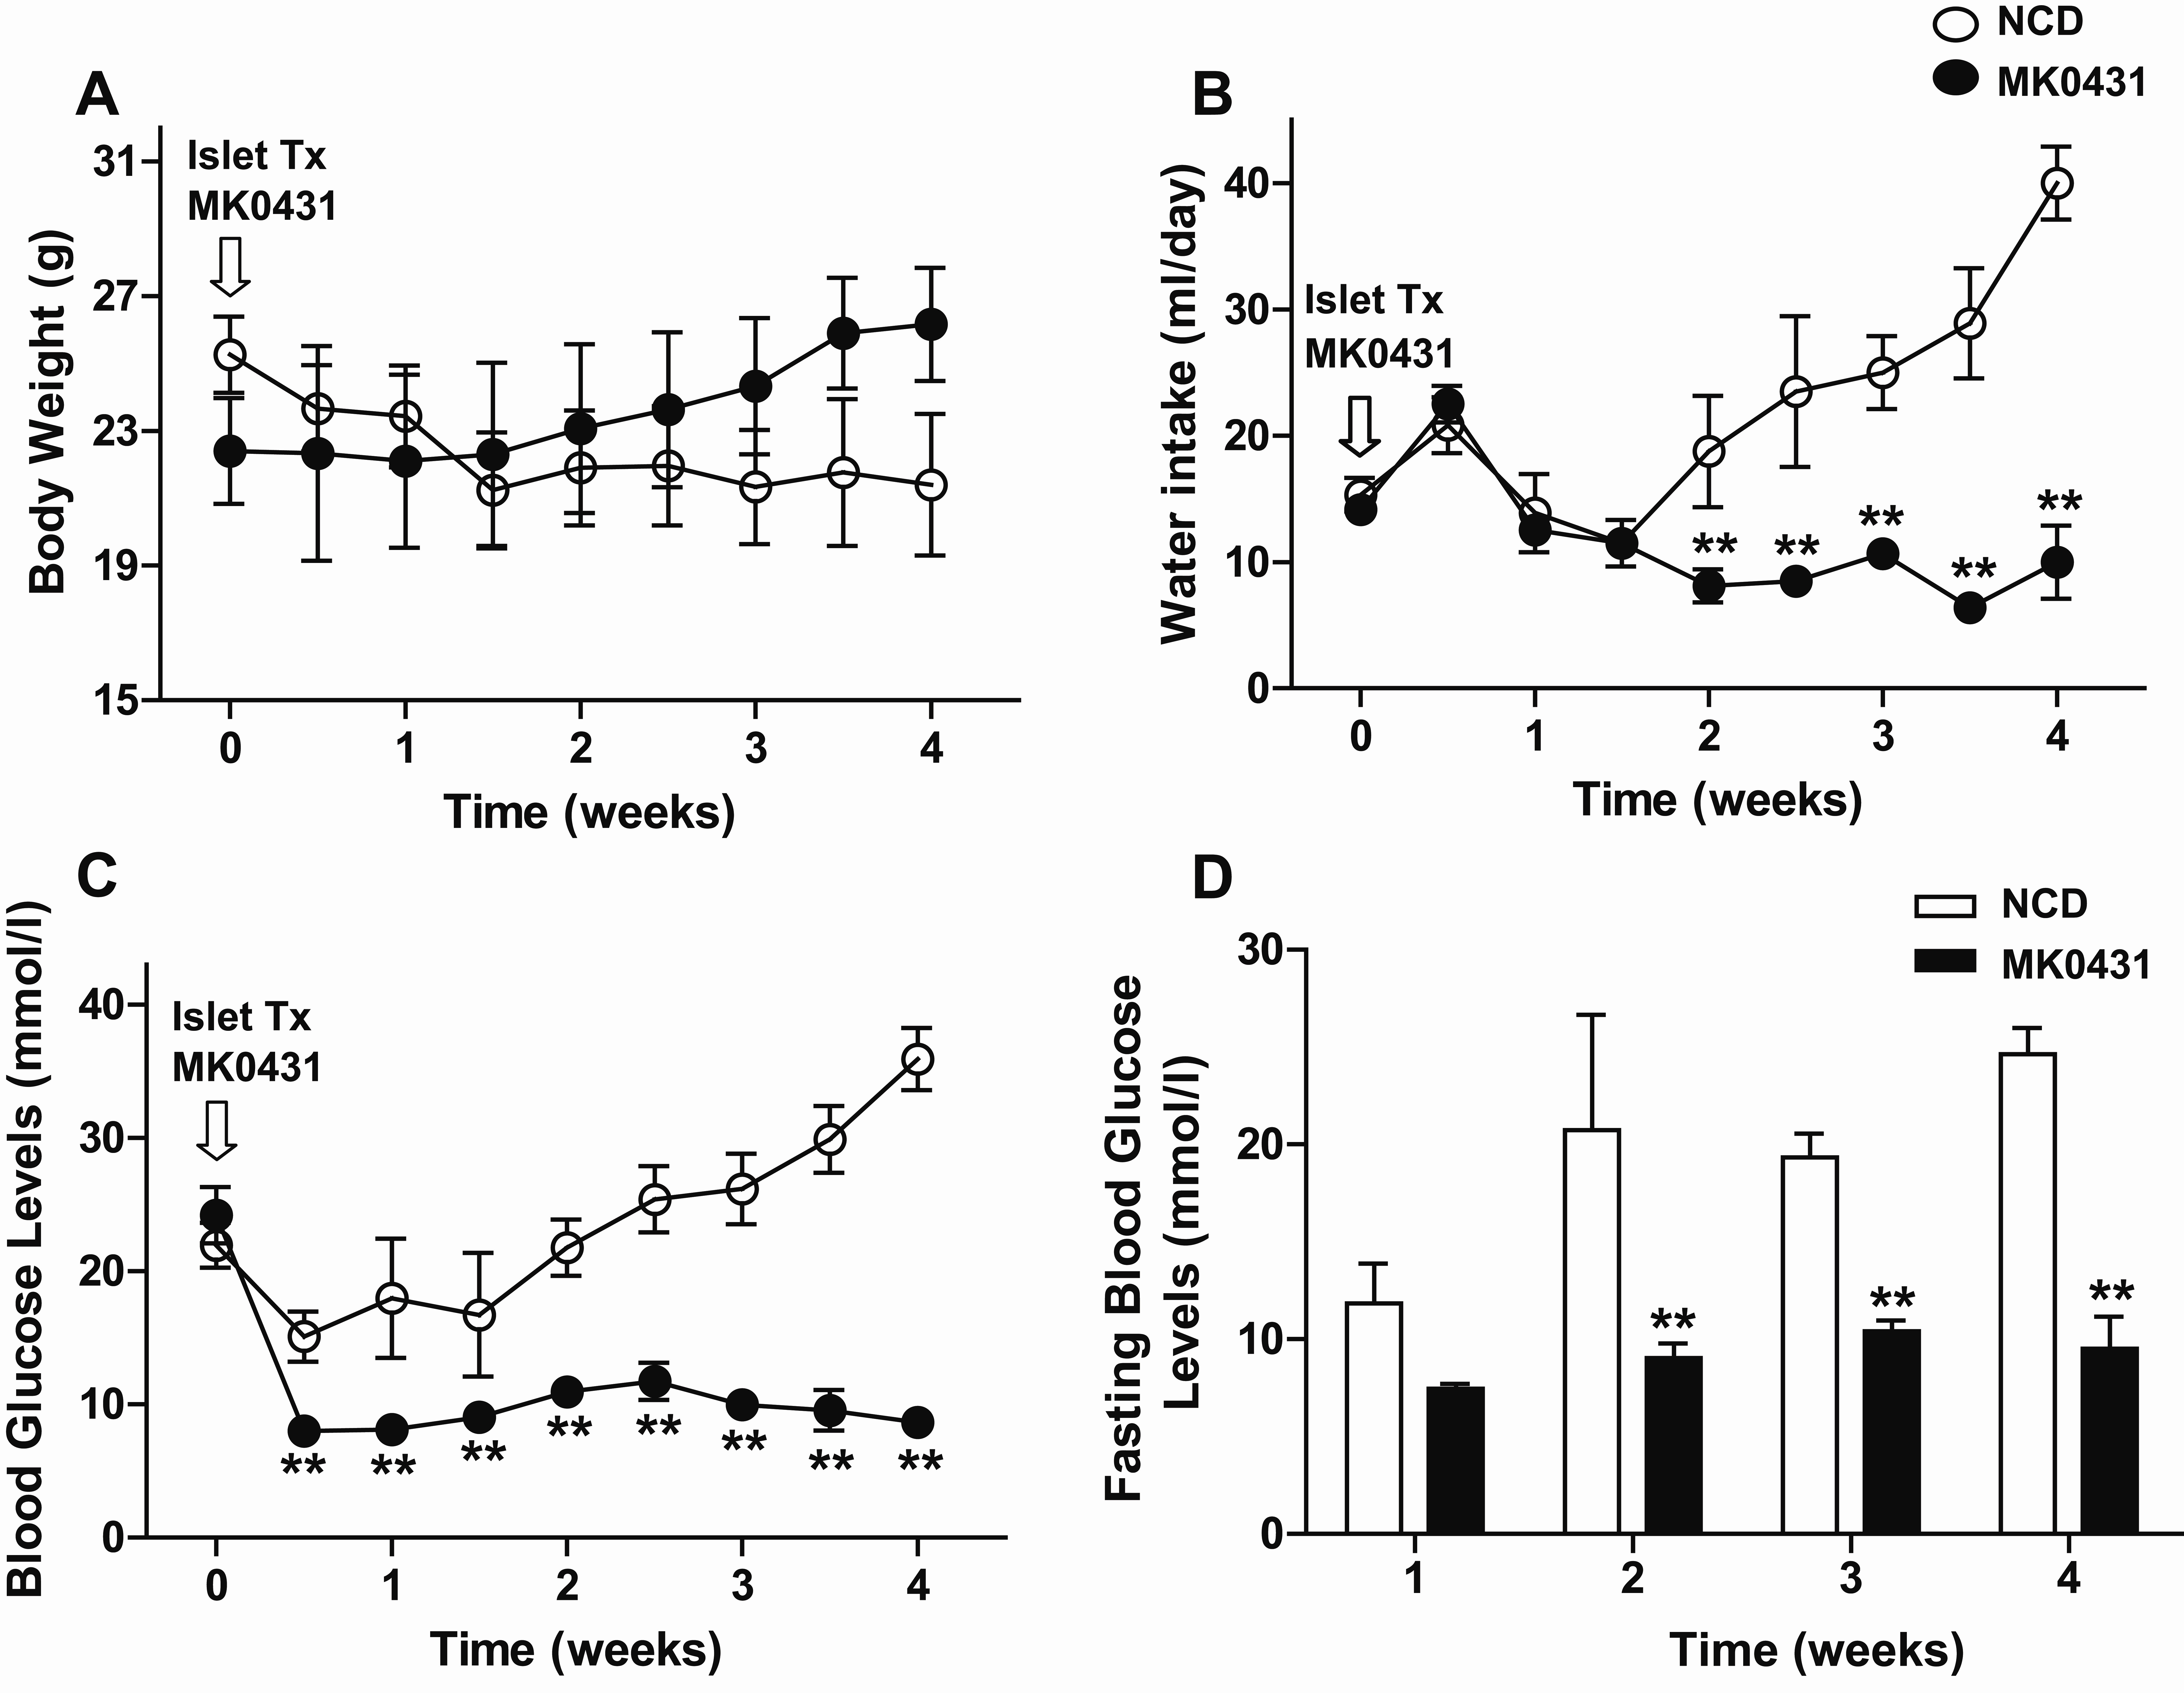
**

**FIGURE 3(A-D)**

**
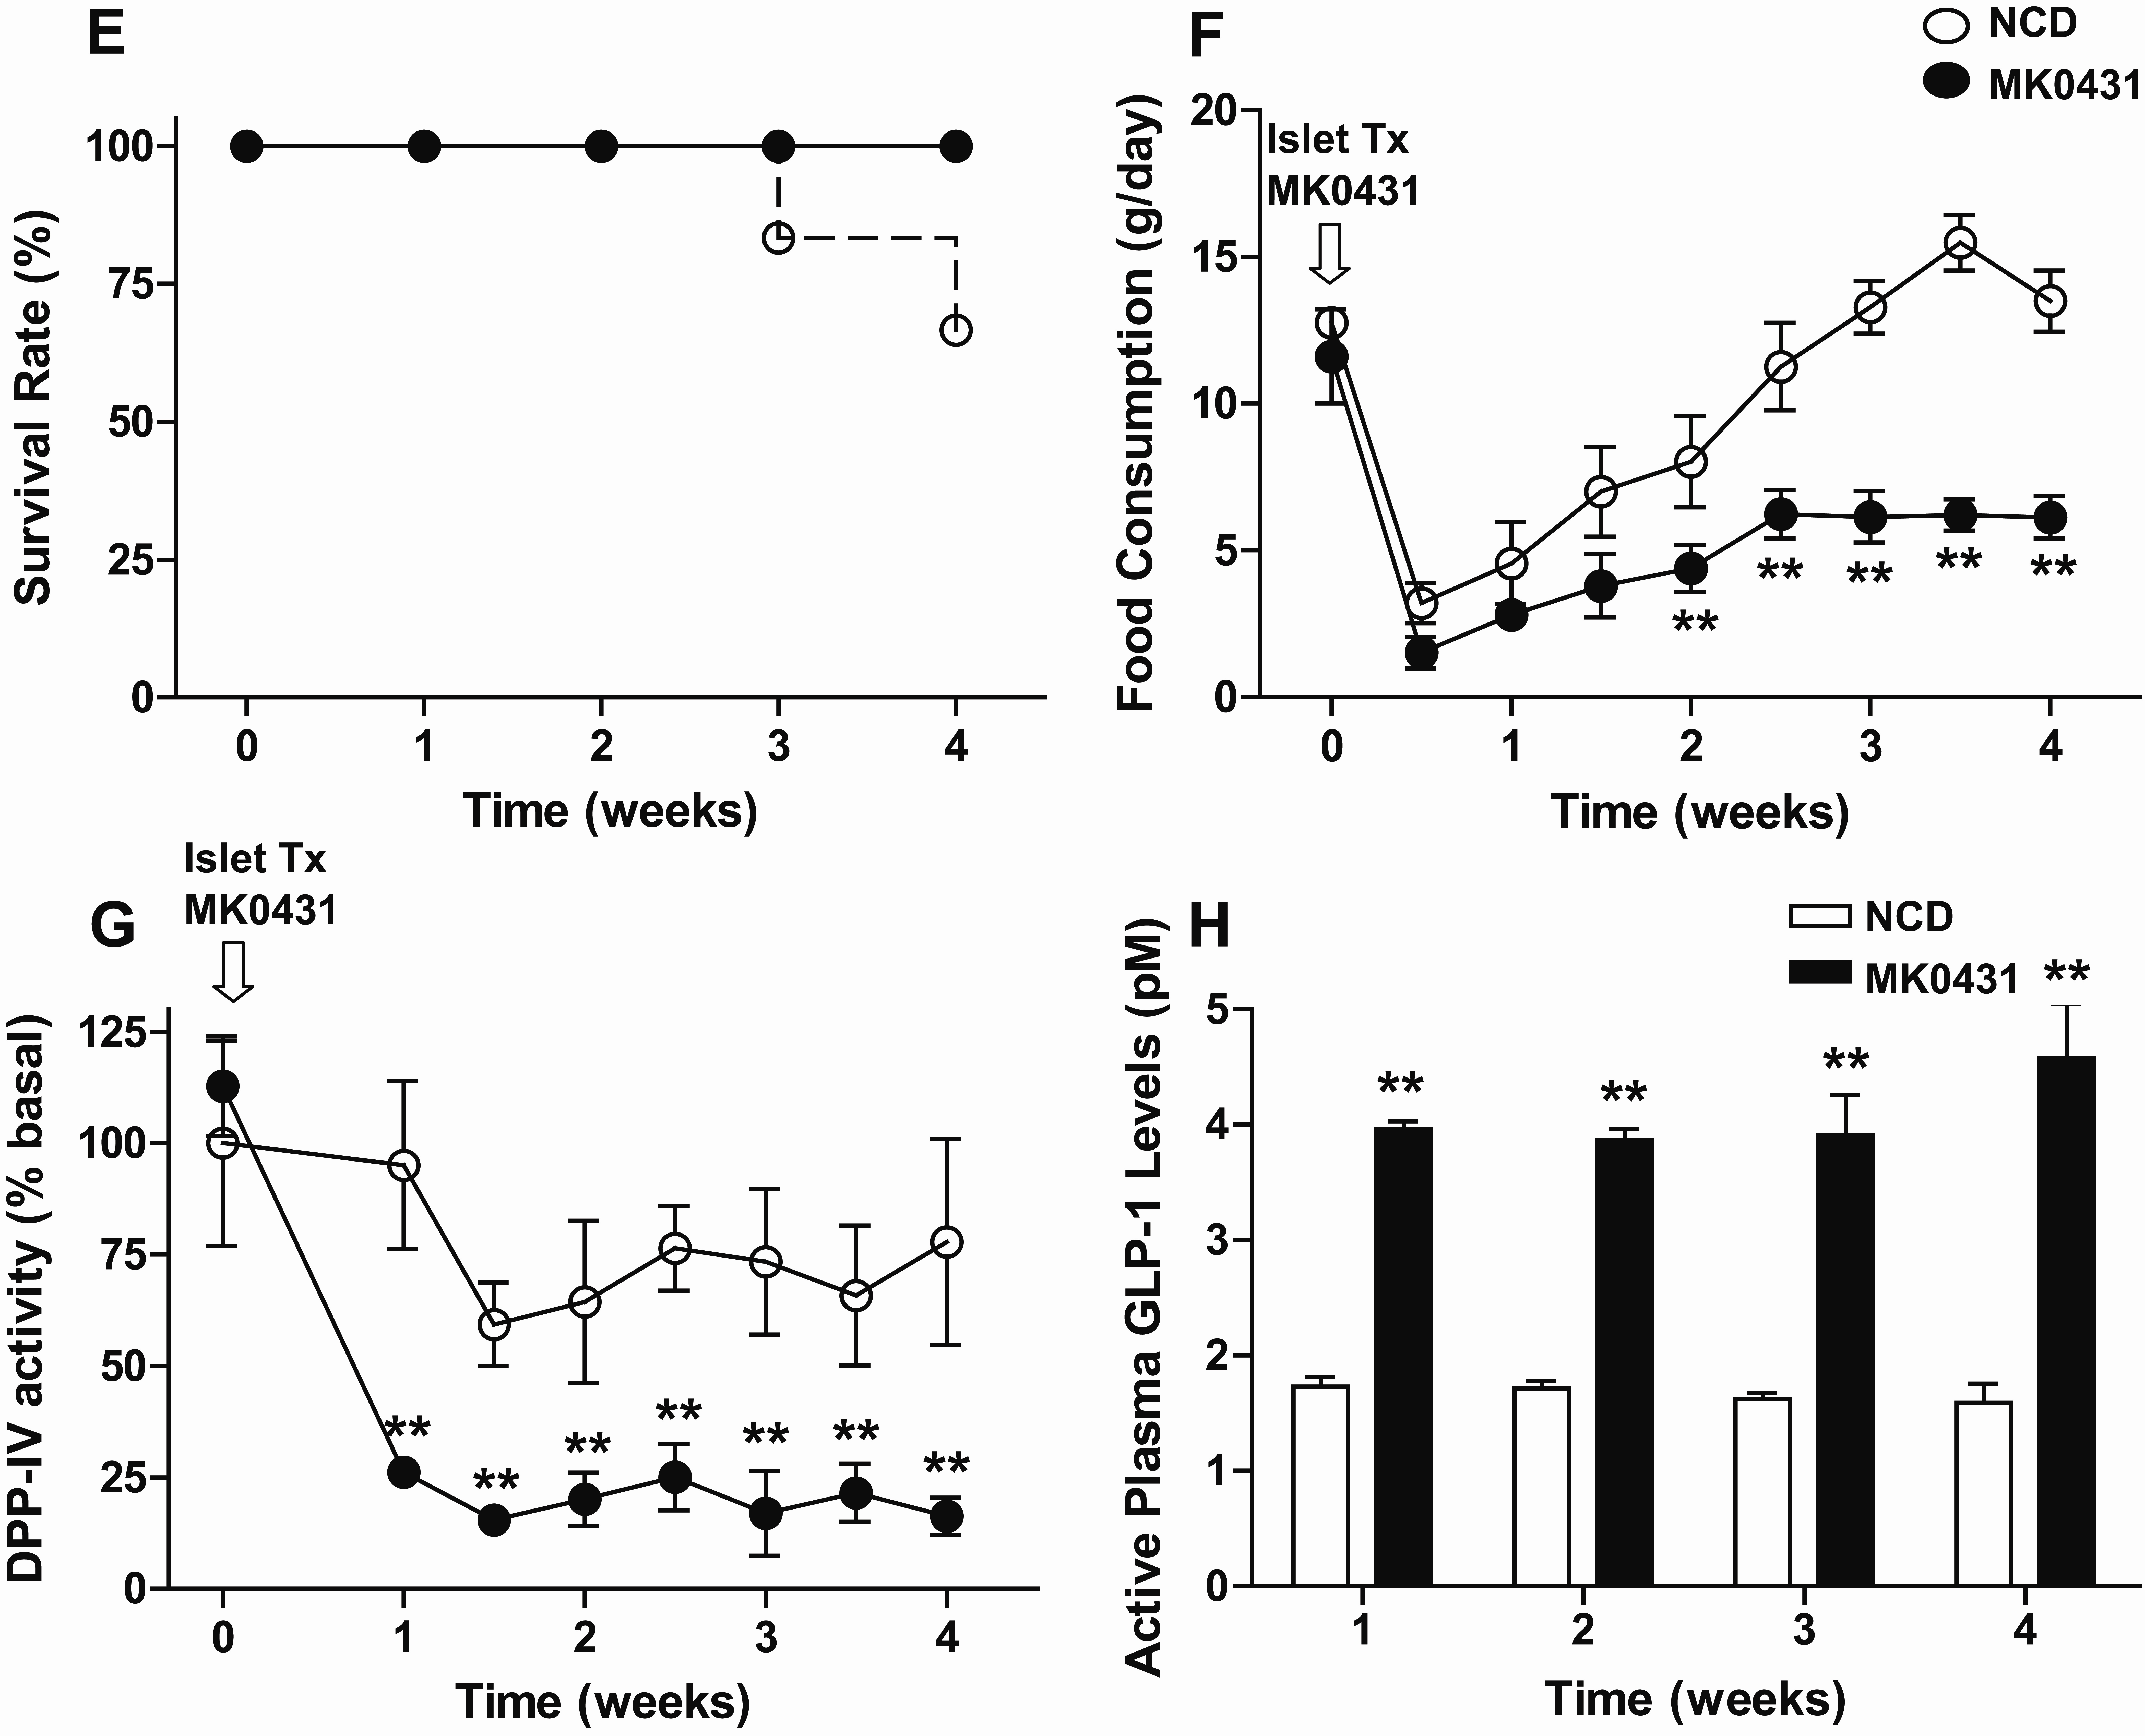
**

**FIGURE 3(E-H)**

Supplement: db071639figures.doc [file db071639figures.doc]
